# Supplementary material for: Relationship between socioeconomic status and gastrointestinal infections in developed countries: A systematic review and meta-analysis
Source: PubMed Central journal article supplement (PMC5779704; doi:10.1371/journal.pone.0191633), 2018-01-23
Supplement: pone.0191633.s001.pdf [file pone.0191633.s001.pdf]

## Supplementary Information File

**Table A: Search terms**

Medline (Ovid)

- #1. Exp Socioeconomic Factors/
- #2. Education\*.mp.
- #3. Exp Employment/
- #4. Income\*.mp.
- #5. Occupation\*.mp.
- #6. Poverty.mp.
- #7. Poorest.mp.
- #8. exp Social Class/
- #9. Inequalit\*.mp.
- #10. Socioeconomic\*.mp.
- #11. Depriv\*.mp.
- #12. Disadvantag\*.mp.
- #13. Salary.mp.
- #14. Underprivileged.mp.
- #15. Social determinant\*.mp.
- #16. (Social adj1 factor\*).mp
- #17. Socio\*.mp
  
- #18. 1 or 2 or 3 or 4 or 5 or 6 or 7 or 8 or 9 or 10 or 11 or 12 or 13 or 14 or 15 or 16 or 17
  
- #19. exp Norovirus/
- #20. Acute gastroenteritis.mp.
- #21. infectious intestinal disease\*.mp.
- #22. gastrointestinal infection\*.mp.
- #23. exp Diarrhea/
- #24. Rotavirus.mp.
- #25. gastrointestinal pathogen\*.mp.
- #26. gastrointestinal bacteria.mp.
- #27. enteric infection\*.mp.
- #28. diarrh\*.mp.
- #29. stomach flu.mp.
- #30. gastric flu.mp.
- #31. stomach bug\*.mp.
- #32. stomach virus\*.mp.
- #33. Exp Campylobacter/
- #34. Exp Escherichia coli/
- #35. Enterobacteriaceae Infection\*.mp.
- #36. Dysentery, Bacillary.mp
- #37. Exp Escherichia coli Infections/
- #38. Yersinia enterocolitica.mp.
- #39. Exp Salmonella Infections/
- #40. Exp Cryptosporidiidae/
- #41. Exp Salmonella/
- #42. Exp Shigella/
- #43. Exp Giardia/
- #44. Escherichia coli.mp.
- #45. Exp Listeria/

- #46. Small round structured virus\*.mp.
- #47. Winter vomiting disease\*.mp.
- #48. Sapovirus.mp.
- #49. Caliciviridae.mp.
- #50. VTEC.mp.
- #51. STEC.mp.
- #52. exp Foodborne Diseases/
- #53. Food poisoning\*.mp.
- #54. Scombros\*.mp.
- #55. Clostridium perfringens.mp.
- #56. Bacillus cereus.mp.
- #57. Hepatitis A.mp.
- #58. Hepatitis E.mp.
  
- #59. 19 or 20 or 21 or 22 or 23 or 24 or 25 or 26 or 27 or 28 or 29 or 30 or 31 or 32 or 33 or 34 or 35 or 36  
or 37 or 38 or 39 or 40 or 41 or 42 or 43 or 44 or 45 or 46 or 47 or 48 or 49 or 50 or 51 or 52 or 53 or  
54 or 55 or 56 or 57 or 58
  
- #60. exp Australia/
- #61. exp Austria/
- #62. exp Belgium/
- #63. exp Canada/
- #64. exp Chile/
- #65. exp Czech Republic/
- #66. exp Denmark/
- #67. exp Estonia/
- #68. exp Finland/
- #69. exp France/
- #70. exp Germany/
- #71. exp Greece/
- #72. exp Hungary/
- #73. exp Iceland/
- #74. exp Ireland/
- #75. exp Israel/
- #76. exp Italy/
- #77. exp Japan/
- #78. exp Korea/
- #79. exp Luxembourg/
- #80. exp Mexico/
- #81. exp Netherlands/
- #82. exp New Zealand/
- #83. exp Norway/
- #84. exp Poland/
- #85. exp Portugal/
- #86. exp Slovak Republic/
- #87. exp Slovenia/
- #88. exp Spain/
- #89. exp Sweden/
- #90. exp Switzerland/
- #91. exp Turkey/
- #92. exp United Kingdom/
- #93. exp United States/



- #38. "paratyphoid fever"
- #39. "typhoid fever"
- #40. "Small round structured virus\*"
- #41. "Winter vomiting disease\*"
- #42. Sapovirus
- #43. Caliciviridae
- #44. Campylobacter\*
- #45. Cryptospor\*
- #46. Salmonell\*
- #47. Shigell\*
- #48. Giardia\*
- #49. Listeri\*
- #50. VTEC
- #51. STEC
- #52. "Foodborne Disease\*"
- #53. Botulism
- #54. "Staphylococcal Food Poisoning\*"
- #55. "Food poisoning\*"
- #56. Scombro\*
- #57. "Clostridium perfringens"
- #58. "Bacillus cereus"
- #59. "Hepatitis A"
- #60. "Hepatitis E"
  
- #61. 20 or 21 or 22 or 23 or 24 or 25 or 26 or 27 or 28 or 29 or 30 or 31 or 32 or 33 or 34 or 35 or 36 or 37 or 38 or 39 or 40 or 41 or 42 or 43 or 44 or 45 or 46 or 47 or 48 or 49 or 50 or 51 or 52 or 53 or 54 or 55 or 56 or 57 or 58 or 59 or 60
  
- #62. Australia\*
- #63. "New South Wales"
- #64. "Northern Territory"
- #65. Queensland
- #66. Tasmania
- #67. Victoria
- #68. Austria
- #69. Belgium
- #70. Canada
- #71. Alberta
- #72. "British Columbia"
- #73. Manitoba
- #74. "New Brunswick"
- #75. "Newfoundland and Labrador"
- #76. "Northwest Territories"
- #77. "Nova Scotia"
- #78. Nunavut
- #79. Ontario
- #80. "Prince Edward Island"
- #81. Quebec
- #82. Saskatchewan

- #83. “Yukon Territory”
- #84. Chile
- #85. “Czech Republic”
- #86. Denmark
- #87. Greenland
- #88. Estonia
- #89. Finland
- #90. France
- #91. Paris
- #92. Germany
- #93. Berlin
- #94. Greece
- #95. Hungary
- #96. Iceland
- #97. Ireland
- #98. Israel
- #99. Italy
- #100. Rome
- #101. Sicily
- #102. Japan
- #103. Tokyo
- #104. Korea
- #105. Seoul
- #106. Luxembourg
- #107. Mexico
- #108. Netherlands
- #109. “New Zealand”
- #110. Norway
- #111. Svalbard
- #112. Poland
- #113. Portugal
- #114. “Slovak Republic”
- #115. Slovakia
- #116. Slovenia
- #117. Spain
- #118. Sweden
- #119. Switzerland
- #120. Turkey
- #121. “United Kingdom”
- #122. “Great Britain”
- #123. “Channel Islands”
- #124. Guernsey
- #125. England
- #126. London
- #127. Scotland
- #128. Hebrides
- #129. Wales
- #130. “United States”
- #131. “Appalachian Region”

- #132. Alabama
- #133. Georgia
- #134. Kentucky
- #135. Maryland
- #136. "New York"
- #137. Carolina
- #138. Ohio
- #139. Pennsylvania
- #140. Tennessee
- #141. Virginia
- #142. "Great Lakes Region"
- #143. Illinois
- #144. Chicago
- #145. Indiana
- #146. Michigan
- #147. Minnesota
- #148. Wisconsin
- #149. "Mid-Atlantic Region"
- #150. Delaware
- #151. "District of Columbia"
- #152. Baltimore
- #153. "New Jersey"
- #154. Philadelphia
- #155. Iowa
- #156. Kansas
- #157. Missouri
- #158. Nebraska
- #159. Dakota
- #160. Oklahoma
- #161. "New England"
- #162. Connecticut
- #163. Maine
- #164. Massachusetts
- #165. Boston
- #166. "New Hampshire"
- #167. "Rhode Island"
- #168. Vermont
- #169. Idaho
- #170. Montana
- #171. Oregon
- #172. Washington
- #173. Wyoming
- #174. "Pacific States"
- #175. Alaska
- #176. California
- #177. "Los Angeles"
- #178. "San Francisco"
- #179. Hawaii
- #180. Arkansas

- #181. Florida
- #182. Louisiana
- #183. “New Orleans”
- #184. Mississippi
- #185. Arizona
- #186. Colorado
- #187. Nevada
- #188. “New Mexico”
- #189. Texas
- #190. Utah

#191. 62 or 63 or 64 or 65 or 66 or 67 or 68 or 69 or 70 or 71 or 72 or 73 or 74 or 75 or 76 or 77 or 78 or 79 or 80 or 81 or 82 or 83 or 84 or 85 or 86 or 87 or 88 or 89 or 90 or 91 or 92 or 93 or 94 or 95 or 96 or 97 or 98 or 99 or 100 or 101 or 102 or 103 or 104 or 105 or 106 or 107 or 108 or 109 or 110 or 111 or 112 or 113 or 114 or 115 or 116 or 117 or 118 or 119 or 120 or 121 or 122 or 123 or 124 or 125 or 126 or 127 or 128 or 129 or 130 or 131 or 132 or 133 or 134 or 135 or 136 or 137 or 138 or 139 or 140 or 141 or 142 or 143 or 144 or 145 or 146 or 147 or 148 or 149 or 150 or 151 or 152 or 153 or 154 or 155 or 156 or 157 or 158 or 159 or 160 or 161 or 162 or 163 or 164 or 165 or 166 or 167 or 168 or 169 or 170 or 171 or 172 or 173 or 174 or 175 or 176 or 177 or 178 or 179 or 180 or 181 or 182 or 183 or 184 or 185 or 186 or 187 or 188 or 189 or 190

#192. 19 and 61 and 191

**Table B: Included/excluded studies**



**Table B1: Included studies summary**

| First Author     | Reference Number | Year | Quality | Country/Region | Region        | Age Group     | Sample Size | Level – individual/ area | Study Design    | Pathogen/symptom               | GI Measure              | SES Measure       | Included in meta-analysis | Reason for exclusion from meta-analysis |
|------------------|------------------|------|---------|----------------|---------------|---------------|-------------|--------------------------|-----------------|--------------------------------|-------------------------|-------------------|---------------------------|-----------------------------------------|
| Adlam            | <sup>1</sup>     | 2011 | High    | New Zealand    | Oceania       | All           | 1001-5000   | Individual               | Cross-sectional | Acute GI infection (syndromic) | Population based survey | Income            | Y                         |                                         |
| Arena            | <sup>2</sup>     | 2014 | Medium  | France         | Europe        | Adults        | <200        | Individual               | Case-control    | Multi-pathogen                 | GP Presentation         | Multiple measures | Y                         |                                         |
| Arsenault        | <sup>3</sup>     | 2012 | Low     | Canada         | North America | All           | >100,000    | Area                     | Ecological      | Campylobacteriosis             | Laboratory records      | Education         | Y                         |                                         |
| Baker            | <sup>4</sup>     | 1998 | Low     | UK/Ireland     | Europe        | Children      | 5001-10,000 | Individual               | Cohort          | Acute GI infection (syndromic) | Population based survey | Education         | Y                         |                                         |
| Banatvala        | <sup>5</sup>     | 1999 | Low     | UK/Ireland     | Europe        | All           | >100,000    | Area                     | Ecological      | Salmonellosis                  | Laboratory records      | Deprivation       | Y                         |                                         |
| Barros           | <sup>6</sup>     | 2003 | Low     | Portugal       | Europe        | Children      | 200-1000    | Individual               | Cohort          | Acute GI infection (syndromic) | Population based survey | Education         | Y                         |                                         |
| Beale            | <sup>7</sup>     | 2010 | Low     | UK/Ireland     | Europe        | Children      | 5001-10,000 | Area                     | Cohort          | Acute GI infection (syndromic) | Population based survey | Social class      | N                         | Analysed same individuals as Baker 1998 |
| Beaudry          | <sup>8</sup>     | 1995 | Low     | Canada         | North America | Children      | 200-1000    | Individual               | Cohort          | Acute GI infection (syndromic) | Population based survey | Social class      | Y                         |                                         |
| Bemis            | <sup>9</sup>     | 2014 | Low     | United States  | North America | All           | >100,000    | Area                     | Ecological      | Campylobacteriosis             | Laboratory records      | Deprivation       | Y                         |                                         |
| Bessell          | <sup>10</sup>    | 2010 | Low     | UK/Ireland     | Europe        | All           | >100,000    | Area                     | Ecological      | Campylobacteriosis             | Laboratory records      | Deprivation       | Y                         |                                         |
| Biering-Sorensen | <sup>11</sup>    | 2012 | High    | Denmark        | Europe        | Children      | >100,000    | Individual               | Cohort          | Acute GI infection (syndromic) | Hospital admission      | Education         | Y                         |                                         |
| Bless            | <sup>12</sup>    | 2014 | High    | Switzerland    | Europe        | All           | 200-1000    | Individual               | Case-control    | Campylobacteriosis             | Laboratory records      | Education         | Y                         |                                         |
| Borgnolo         | <sup>13</sup>    | 1996 | High    | Italy          | Europe        | Children      | 200-1000    | Individual               | Case-control    | Salmonellosis                  | Hospital admission      | Occupation        | Y                         |                                         |
| Bozkurt          | <sup>14</sup>    | 1999 | Low     | Turkey         | Europe        | Children      | 200-1000    | Individual               | Cross-sectional | Acute GI infection (syndromic) | Population based survey | Multiple measures | Y                         |                                         |
| Bozkurt          | <sup>15</sup>    | 2003 | Low     | Turkey         | Europe        | Children      | 200-1000    | Individual               | Cohort          | Acute GI infection (syndromic) | Population based survey | Multiple measures | Y                         |                                         |
| Britton          | <sup>16</sup>    | 2010 | Low     | New Zealand    | Oceania       | Not specified | >100,000    | Area                     | Ecological      | Multi-pathogen                 | Laboratory records      | Deprivation       | Y                         |                                         |
| Chang            | <sup>17</sup>    | 2009 | High    | United States  | North America | All           | >100,000    | Area                     | Ecological      | Multi-pathogen                 | Laboratory records      | Multiple measures | N                         | Did not use a dichotomous outcome       |
| Cohen            | <sup>18</sup>    | 2008 | Low     | United States  | North         | All           | >100,000    | Area                     | Ecological      | Multi-pathogen                 | Laboratory              | Income            | Y                         |                                         |

|             |               |      |        |               |               |          |                |            |                 |                                |                         |                   |   |                                   |
|-------------|---------------|------|--------|---------------|---------------|----------|----------------|------------|-----------------|--------------------------------|-------------------------|-------------------|---|-----------------------------------|
|             |               |      |        |               | America       |          |                |            |                 |                                | records                 |                   |   |                                   |
| Danis       | <sup>19</sup> | 2009 | Low    | UK/Ireland    | Europe        | All      | 200-1000       | Individual | Case-control    | Campylobacteriosis             | Laboratory records      | Employment        | Y |                                   |
| de Wit      | <sup>20</sup> | 2001 | Medium | Netherlands   | Europe        | All      | 1001-5000      | Individual | Cohort          | Acute GI infection (syndromic) | Population based survey | Education         | Y |                                   |
| de Wit      | <sup>21</sup> | 2003 | Low    | Netherlands   | Europe        | All      | 200-1000       | Individual | Case-control    | Multi-pathogen                 | Population based survey | Education         | N | Subset of de Wit 2001             |
| Dennehy     | <sup>22</sup> | 2006 | High   | United States | North America | Children | 1001-5000      | Individual | Case-control    | Rotavirus                      | Hospital admission      | Education         | Y |                                   |
| Doorduyn    | <sup>23</sup> | 2012 | High   | Netherlands   | Europe        | All      | 1001-5000      | Individual | Cross-sectional | Acute GI infection (syndromic) | Population based survey | Education         | Y |                                   |
| Doré        | <sup>24</sup> | 2004 | High   | Canada        | North America | All      | 200-1000       | Individual | Case-control    | Salmonellosis                  | Laboratory records      | Education         | Y |                                   |
| Duggirala   | <sup>25</sup> | 2005 | Low    | United States | North America | All      | 200-1000       | Individual | Case-control    | Hepatitis A                    | Laboratory records      | Education         | Y |                                   |
| Eaton-Evans | <sup>26</sup> | 1987 | Low    | Australia     | Oceania       | Children | <200           | Individual | Cohort          | Acute GI infection (syndromic) | Population based survey | Occupation        | N | Insufficient quantitative data    |
| Ethelberg   | <sup>27</sup> | 2006 | Medium | Denmark       | Europe        | Children | 1001-5000      | Individual | Case-control    | Acute GI infection (syndromic) | Laboratory records      | Multiple measures | Y |                                   |
| Etiler      | <sup>28</sup> | 2004 | Low    | Turkey        | Europe        | Children | 200-1000       | Individual | Cohort          | Acute GI infection (syndromic) | Population based survey | Multiple measures | Y |                                   |
| Evans       | <sup>29</sup> | 2006 | Medium | UK/Ireland    | Europe        | Adults   | 10,001-100,000 | Individual | Cross-sectional | Acute GI infection (syndromic) | Population based survey | Employment        | Y |                                   |
| Faustini    | <sup>30</sup> | 2006 | Medium | Italy         | Europe        | All      | <200           | Individual | Case-control    | Giardiasis                     | Laboratory records      | Education         | Y |                                   |
| Fein        | <sup>31</sup> | 1995 | High   | United States | North America | Adults   | 1001-5000      | Individual | Cross-sectional | Acute GI infection (syndromic) | Population based survey | Education         | Y |                                   |
| Fewtrell    | <sup>32</sup> | 1997 | Low    | UK/Ireland    | Europe        | All      | >100,000       | Area       | Ecological      | Multi-pathogen                 | Laboratory records      | Employment        | N | Did not use a dichotomous outcome |
| Friedman    | <sup>33</sup> | 2004 | Low    | United States | North America | All      | 1001-5000      | Individual | Case-control    | Campylobacteriosis             | Laboratory records      | Multiple measures | Y |                                   |
| Fullerton   | <sup>34</sup> | 2007 | Medium | United States | North America | Children | 1001-5000      | Individual | Case-control    | Campylobacteriosis             | Laboratory records      | Multiple measures | Y |                                   |
| Gillespie   | <sup>35</sup> | 2008 | Low    | UK/Ireland    | Europe        | All      | >100,000       | Area       | Ecological      | Campylobacteriosis             | Laboratory records      | Occupation        | Y |                                   |
| Gillespie   | <sup>36</sup> | 2010 | Low    | UK/Ireland    | Europe        | All      | >100,000       | Area       | Ecological      | Listeriosis                    | Laboratory records      | Deprivation       | Y |                                   |
| Green       | <sup>37</sup> | 2006 | High   | Canada        | North America | All      | >100,000       | Area       | Ecological      | Campylobacteriosis             | Laboratory records      | Social class      | Y |                                   |
| Gupta       | <sup>38</sup> | 2004 | Low    | United States | North America | All      | >100,000       | Area       | Ecological      | Shigellosis                    | Laboratory records      | Deprivation       | N | Insufficient quantitative data    |

|            |               |      |        |               |               |               |                |            |                 |                                |                         |                   |   |                                         |
|------------|---------------|------|--------|---------------|---------------|---------------|----------------|------------|-----------------|--------------------------------|-------------------------|-------------------|---|-----------------------------------------|
| Hall       | <sup>39</sup> | 2006 | High   | Australia     | Oceania       | All           | 5001-10,000    | Individual | Cross-sectional | Acute GI infection (syndromic) | Population based survey | Multiple measures | Y |                                         |
| Herikstad  | <sup>40</sup> | 2002 | Medium | United States | North America | All           | 5001-10,000    | Individual | Cross-sectional | Acute GI infection (syndromic) | Population based survey | Multiple measures | N | Analysed same individuals as Jones 2007 |
| Hu         | <sup>41</sup> | 2009 | Low    | Australia     | Oceania       | Not specified | >100,000       | Area       | Ecological      | Cryptosporidiosis              | Laboratory records      | Multiple measures | Y |                                         |
| Hu         | <sup>42</sup> | 2010 | Low    | Australia     | Oceania       | Not specified | >100,000       | Area       | Ecological      | Cryptosporidiosis              | Laboratory records      | Social class      | N | Did not use a dichotomous outcome       |
| Hughes     | <sup>43</sup> | 2015 | Low    | UK/Ireland    | Europe        | All           | >100,000       | Area       | Ecological      | Multi-pathogen                 | Laboratory records      | Deprivation       | Y |                                         |
| Iacono     | <sup>44</sup> | 2005 | High   | Italy         | Europe        | Children      | 1001-5000      | Individual | Cohort          | Acute GI infection (syndromic) | Population based survey | Education         | N | Insufficient quantitative data          |
| Jackson    | <sup>45</sup> | 2015 | Low    | United States | North America | Children      | >100,000       | Area       | Ecological      | Shigellosis                    | Laboratory records      | Deprivation       | Y |                                         |
| Jalava     | <sup>46</sup> | 2011 | Low    | Finland       | Europe        | All           | >100,000       | Area       | Ecological      | STEC                           | Laboratory records      | Multiple measures | Y |                                         |
| Jones      | <sup>47</sup> | 2007 | Medium | United States | North America | All           | 10,001-100,000 | Individual | Cross-sectional | Acute GI infection (syndromic) | Population based survey | Education         | Y |                                         |
| Kass       | <sup>48</sup> | 1992 | Low    | United States | North America | All           | 200-1000       | Individual | Case-control    | Salmonellosis                  | Laboratory records      | Income            | Y |                                         |
| Kotloff    | <sup>49</sup> | 1988 | Medium | United States | North America | Children      | 200-1000       | Individual | Case-control    | Acute GI infection (syndromic) | Hospital admission      | Education         | N | Insufficient quantitative data          |
| Kum-Nji    | <sup>50</sup> | 2009 | High   | United States | North America | Children      | 200-1000       | Individual | Cohort          | Acute GI infection (syndromic) | Hospital admission      | Employment        | Y |                                         |
| Kyle       | <sup>51</sup> | 2011 | Low    | UK/Ireland    | Europe        | Children      | >100,000       | Area       | Ecological      | Acute GI infection (syndromic) | Hospital admission      | Deprivation       | N | Did not use a dichotomous outcome       |
| Lake       | <sup>52</sup> | 2007 | Low    | UK/Ireland    | Europe        | All           | 5001-10,000    | Area       | Ecological      | Cryptosporidiosis              | Laboratory records      | Occupation        | Y |                                         |
| Lake       | <sup>53</sup> | 2009 | Low    | UK/Ireland    | Europe        | All           | >100,000       | Area       | Ecological      | Cryptosporidiosis              | Laboratory records      | Social class      | N | Insufficient quantitative data          |
| Lal        | <sup>54</sup> | 2012 | Medium | New Zealand   | Oceania       | All           | >100,000       | Area       | Ecological      | Salmonellosis                  | Multiple measures       | Deprivation       | Y |                                         |
| Lee        | <sup>55</sup> | 1991 | Low    | United States | North America | All           | >100,000       | Area       | Ecological      | Shigellosis                    | Laboratory records      | Deprivation       | N | Insufficient quantitative data          |
| Ludvigsson | <sup>56</sup> | 2006 | Low    | Sweden        | Europe        | Children      | 5001-10,000    | Individual | Cohort          | Acute GI infection (syndromic) | Population based survey | Education         | Y |                                         |

|             |               |      |        |               |               |               |                |            |                 |                                |                         |                   |   |                                   |
|-------------|---------------|------|--------|---------------|---------------|---------------|----------------|------------|-----------------|--------------------------------|-------------------------|-------------------|---|-----------------------------------|
| MacRitchie  | <sup>57</sup> | 2013 | Low    | UK/Ireland    | Europe        | All           | >100,000       | Area       | Ecological      | Campylobacteriosis             | Laboratory records      | Deprivation       | N | Insufficient quantitative data    |
| Majowicz    | <sup>58</sup> | 2007 | Medium | Canada        | North America | All           | 5001-10,000    | Individual | Cross-sectional | Acute GI infection (syndromic) | Population based survey | Multiple measures | Y |                                   |
| McAteer     | <sup>59</sup> | 2011 | High   | UK/Ireland    | Europe        | Adults        | 1001-5000      | Individual | Cross-sectional | Acute GI infection (syndromic) | Population based survey | Multiple measures | N | Insufficient quantitative data    |
| McPherson   | <sup>60</sup> | 2009 | Medium | Australia     | Oceania       | All           | 200-1000       | Individual | Case-control    | STEC                           | Laboratory records      | Education         | Y |                                   |
| Moorin      | <sup>61</sup> | 2010 | Medium | Australia     | Oceania       | All           | >100,000       | Area       | Cohort          | Acute GI infection (syndromic) | Hospital admission      | Social class      | Y |                                   |
| Neal        | <sup>62</sup> | 1997 | Low    | UK/Ireland    | Europe        | Adults        | 200-1000       | Individual | Case-control    | Campylobacteriosis             | Laboratory records      | Social class      | Y |                                   |
| Nichols     | <sup>63</sup> | 2012 | Low    | UK/Ireland    | Europe        | All           | >100,000       | Area       | Ecological      | Campylobacteriosis             | Laboratory records      | Deprivation       | N | Insufficient quantitative data    |
| Odoi        | <sup>64</sup> | 2004 | Medium | Canada        | North America | Not specified | >100,000       | Area       | Ecological      | Giardiasis                     | Laboratory records      | Income            | Y |                                   |
| Olowokure   | <sup>65</sup> | 1999 | Low    | UK/Ireland    | Europe        | All           | >100,000       | Area       | Ecological      | Acute GI infection (syndromic) | Hospital admission      | Deprivation       | Y |                                   |
| Özkan       | <sup>66</sup> | 2007 | Low    | Turkey        | Europe        | All           | 200-1000       | Individual | Cross-sectional | Acute GI infection (syndromic) | Population based survey | Income            | Y |                                   |
| Özmert      | <sup>67</sup> | 2008 | Low    | Turkey        | Europe        | Children      | 200-1000       | Individual | Case-control    | Acute GI infection (syndromic) | Hospital admission      | Education         | Y |                                   |
| Pardhan-Ali | <sup>68</sup> | 2013 | Low    | Canada        | North America | All           | 10,001-100,000 | Area       | Ecological      | Multi-pathogen                 | Laboratory records      | Multiple measures | N | Insufficient quantitative data    |
| Pearl       | <sup>69</sup> | 2009 | Low    | Canada        | North America | All           | >100,000       | Area       | Ecological      | STEC                           | Laboratory records      | Income            | N | Insufficient quantitative data    |
| Penrose     | <sup>70</sup> | 2007 | Low    | United States | North America | All           | >100,000       | Area       | Ecological      | Giardiasis                     | Laboratory records      | Income            | N | Insufficient quantitative data    |
| Phillips    | <sup>71</sup> | 2011 | Low    | UK/Ireland    | Europe        | Children      | 200-1000       | Individual | case-control    | Norovirus                      | GP Presentation         | Occupation        | Y |                                   |
| Pockett     | <sup>72</sup> | 2011 | Medium | UK/Ireland    | Europe        | Children      | >100,000       | Area       | Ecological      | Acute GI infection (syndromic) | Hospital admission      | Deprivation       | N | Did not use a dichotomous outcome |
| Pollard     | <sup>73</sup> | 2014 | High   | Australia     | Oceania       | Adults        | 1001-5000      | Individual | Cross-sectional | Acute GI infection (syndromic) | Population based survey | Education         | Y |                                   |
| Pyra        | <sup>74</sup> | 2012 | Low    | United States | North America | Adults        | >100,000       | Area       | Ecological      | Campylobacteriosis             | Laboratory records      | Multiple measures | Y |                                   |
| Quigley     | <sup>75</sup> | 2006 | Medium | UK/Ireland    | Europe        | Children      | 200-1000       | Individual | Case-control    | Acute GI infection (syndromic) | GP Presentation         | Occupation        | N | Data analysed within Phillips     |

|                            |               |      |        |             |               |               |                |            |                 |                                |                         |                   |   |                                              |
|----------------------------|---------------|------|--------|-------------|---------------|---------------|----------------|------------|-----------------|--------------------------------|-------------------------|-------------------|---|----------------------------------------------|
|                            |               |      |        |             |               |               |                |            |                 |                                |                         |                   |   | 2011,<br>Rodrigues<br>2001 and<br>Sethi 2001 |
| Rind                       | <sup>76</sup> | 2010 | High   | New Zealand | Oceania       | All           | >100,000       | Area       | Ecological      | Campylobacteriosis             | Laboratory records      | Social class      | N | Did not use a dichotomous outcome            |
| Rodrigues                  | <sup>77</sup> | 2001 | Medium | UK/Ireland  | Europe        | All           | 200-1000       | Individual | Case-control    | Campylobacteriosis             | GP Presentation         | Employment        | Y |                                              |
| Sakuma                     | <sup>78</sup> | 2006 | Low    | Japan       | Asia          | All           | >100,000       | Area       | Ecological      | STEC                           | Laboratory records      | Income            | N | Insufficient quantitative data               |
| Sargeant                   | <sup>79</sup> | 2008 | Medium | Canada      | North America | All           | 1001-5000      | Individual | Cross-sectional | Acute GI infection (syndromic) | Population based survey | Multiple measures | Y |                                              |
| Satterthwaite              | <sup>80</sup> | 1999 | Medium | New Zealand | Oceania       | All           | 200-1000       | Individual | Case-control    | Yersinia enterocolitica        | Laboratory records      | Education         | Y |                                              |
| Scallan                    | <sup>81</sup> | 2004 | High   | UK/Ireland  | Europe        | All           | 5001-10,000    | Individual | Cross-sectional | Acute GI infection (syndromic) | Population based survey | Occupation        | Y |                                              |
| Seo                        | <sup>82</sup> | 2012 | High   | Korea       | Asia          | Not specified | >100,000       | Area       | Ecological      | Hepatitis A                    | Laboratory records      | Multiple measures | N | Insufficient quantitative data               |
| Seo                        | <sup>83</sup> | 2013 | Medium | Korea       | Asia          | All           | 1001-5000      | Individual | Case-control    | Hepatitis A                    | Hospital admission      | Multiple measures | Y |                                              |
| Sethi                      | <sup>84</sup> | 2001 | Medium | UK/Ireland  | Europe        | Children      | 200-1000       | Individual | Case-control    | Rotavirus                      | GP Presentation         | Occupation        | Y |                                              |
| Simonsen                   | <sup>85</sup> | 2008 | Medium | Denmark     | Europe        | All           | >100,000       | Individual | Cohort          | Multi-pathogen                 | Laboratory records      | Multiple measures | Y |                                              |
| Spencer                    | <sup>86</sup> | 2012 | Low    | New Zealand | Oceania       | All           | >100,000       | Area       | Ecological      | Campylobacteriosis             | Laboratory records      | Deprivation       | Y |                                              |
| Stafford                   | <sup>87</sup> | 1996 | Low    | Australia   | Oceania       | All           | >100,000       | Area       | Ecological      | Campylobacteriosis             | Laboratory records      | Social class      | Y |                                              |
| Stone                      | <sup>88</sup> | 1994 | Low    | UK/Ireland  | Europe        | All           | 1001-5000      | Individual | Cross-sectional | Acute GI infection (syndromic) | Population based survey | Employment        | N | Insufficient quantitative data               |
| Tam                        | <sup>89</sup> | 2013 | High   | UK/Ireland  | Europe        | All           | 5001-10,000    | Individual | Cohort          | Acute GI infection (syndromic) | Population based survey | Multiple measures | Y |                                              |
| Teschke                    | <sup>90</sup> | 2010 | Medium | Canada      | North America | All           | >100,000       | Area       | Cohort          | Acute GI infection (syndromic) | Multiple measures       | Income            | Y |                                              |
| Turkish Ministry of Health | <sup>91</sup> | 1995 | Low    | Turkey      | Europe        | Children      | 1001-5000      | Individual | Cross-sectional | Acute GI infection (syndromic) | Population based survey | Education         | Y |                                              |
| Unicomb                    | <sup>92</sup> | 2008 | Medium | Australia   | Oceania       | All           | 200-1000       | Individual | Case-control    | Campylobacteriosis             | Laboratory records      | Multiple measures | Y |                                              |
| Van Cauteren               | <sup>93</sup> | 2012 | Medium | France      | Europe        | All           | 10,001-100,000 | Individual | Cross-sectional | Acute GI infection (syndromic) | Population based survey | Multiple measures | Y |                                              |

|                |                |      |        |               |               |               |                |            |                 |                                |                         |                   |   |  |
|----------------|----------------|------|--------|---------------|---------------|---------------|----------------|------------|-----------------|--------------------------------|-------------------------|-------------------|---|--|
| Varga          | <sup>94</sup>  | 2013 | Medium | Canada        | North America | All           | >100,000       | Area       | Ecological      | Salmonellosis                  | Laboratory records      | Multiple measures | Y |  |
| Weisent        | <sup>95</sup>  | 2012 | Low    | United States | North America | Not specified | >100,000       | Area       | Ecological      | Campylobacteriosis             | Laboratory records      | Multiple measures | Y |  |
| Whitney        | <sup>96</sup>  | 2015 | Low    | United States | North America | All           | >100,000       | Area       | Ecological      | Multi-pathogen                 | Laboratory records      | Deprivation       | Y |  |
| Wilking        | <sup>97</sup>  | 2012 | Low    | Germany       | Europe        | All           | >100,000       | Area       | Ecological      | Rotavirus                      | Hospital admission      | Employment        | Y |  |
| Wilking        | <sup>98</sup>  | 2013 | Medium | Germany       | Europe        | Adults        | 10,001-100,000 | Individual | Cross-sectional | Acute GI infection (syndromic) | Population based survey | Income            | Y |  |
| Xu             | <sup>99</sup>  | 2015 | Low    | Australia     | Oceania       | Children      | >100,000       | Area       | Ecological      | Acute GI infection (syndromic) | Hospital admission      | Social class      | Y |  |
| Younus         | <sup>100</sup> | 2007 | Low    | United States | North America | All           | >100,000       | Area       | Ecological      | Salmonellosis                  | Laboratory records      | Multiple measures | Y |  |
| Younus         | <sup>101</sup> | 2010 | Low    | United States | North America | Children      | 200-1000       | Individual | Case-control    | Salmonellosis                  | Laboratory records      | Multiple measures | Y |  |
| Zappe Pasturel | <sup>102</sup> | 2013 | Low    | United States | North America | All           | >100,000       | Area       | Ecological      | Campylobacteriosis             | Laboratory records      | Multiple measures | Y |  |

**Table B2: Reference List for Included Studies**

1. Adlam SB, Perera S, Lake RJ, Campbell DM, Williman JA, Baker MG. Acute gastrointestinal illness in New Zealand: a community study. *Epidemiology and infection*. 2011;139(2):302-8. doi:10.1017/S0950268810000932
2. Arena C, Amoros JP, Vaillant V, Ambert-Balay K, Chikhi-Brachet R, Jourdan-Da Silva N, et al. Acute diarrhea in adults consulting a general practitioner in France during winter: incidence, clinical characteristics, management and risk factors. *BMC infectious diseases*. 2014;14:574-. doi:10.1186/s12879-014-0574-4
3. Arsenault J, Berke, O., Michel, P., Ravel, A., Gosselin, P. Environmental and demographic risk factors for campylobacteriosis: Do various geographical scales tell the same story? *BMC infectious diseases*. 2012;12:-. doi:10.1186/1471-2334-12-318
4. Baker D, Taylor H, Henderson J. Inequality in infant morbidity: Causes and consequences in England in the 1990s. *Journal of epidemiology and community health*. 1998;52(7):451-8; .
5. Banatvala N, Cramp A, Jones IR, Feldman RA. Salmonellosis in North Thames (East), UK: associated risk factors. *Epidemiology and infection*. 1999(122):201-7.
6. Barros H, Lunet N. Association between child-care and acute diarrhea: A study in Portuguese children. *Revista de saude publica*. 2003;37(5):603-8; .
7. Beale N, Peart C, Kay H, Taylor G, Boyd A, Herrick D. 'ALSPAC' infant morbidity and council tax band: Doctor consultations are higher in lower bands. *European journal of public health*. 2010;20(4):403-8. doi:10.1093/eurpub/ckp211
8. Beaudry M, Dufour R., Marcoux S. Relation between infant feeding and infections during the first six months of life. *The Journal of pediatrics*. 1995;126(2):191-7; . doi:10.1016/s0022-3476(95)70544-9
9. Bemis K, Marcus R, Hadler JL. Socioeconomic status and campylobacteriosis, Connecticut, USA, 1999-2009. *Emerging Infectious Diseases*. 2014;20(7):1240-2. doi:<http://dx.doi.org/10.3201/eid2007.131333>
10. Bessell PR, Matthews L, Smith-Palmer A, Rotariu O, Strachan NJ, Forbes KJ, et al. Geographic determinants of reported human *Campylobacter* infections in Scotland. *BMC public health*. 2010;10:423. doi:10.1186/1471-2458-10-423
11. Biering-Sorensen S, Sondergaard G, Vitting Andersen K, Andersen AM, Mortensen LH. Time trends in socio-economic factors and risk of hospitalisation with infectious diseases in pre-school children 1985-2004: a Danish register-based study. *Paediatric and perinatal epidemiology*. 2012;26(3):226-35. doi:10.1111/j.1365-3016.2011.01255.x
12. Bless PJ, Schmutz C, Suter K, Jost M, Hattendorf J, Mausezahl-Feuz M, et al. A tradition and an epidemic: determinants of the campylobacteriosis winter peak in Switzerland. *European journal of epidemiology*. 2014;29(7):527-37.
13. Borgnolo G, Barbone F, Scornavacca G, Franco D, Vinci A, Iuculano F. A case-control study of *Salmonella* gastrointestinal infection in Italian children. *Acta paediatrica*. 1996;85(7):804-8.
14. Bozkurt AI, Ozgur S, Ozcirpici B. The prevalence of diseases with diarrhoea among children under five years old in different socioeconomic levels. *Tr. J. of Medical Sciences*. 1999;29:561-5.
15. Bozkurt AI, Ozgur S, Ozcirpici B. Association between household conditions and diarrheal diseases among children in Turkey: a cohort study. *Pediatrics International*. 2003;45(4):443-51.
16. Britton E, Hales S, Venugopal K, Baker MG. The impact of climate variability and change on cryptosporidiosis and giardiasis rates in New Zealand. *Journal of water and health*. 2010;8(3):561-71. doi:10.2166/wh.2010.049
17. Chang M, Groseclose SL, Zaidi AA, Braden CR. An ecological analysis of sociodemographic factors associated with the incidence of salmonellosis, shigellosis, and *E. coli* O157:H7 infections in US counties. *Epidemiology & Infection*. 2009;137(6):810-20. doi:<http://dx.doi.org/10.1017/S0950268808001477>

18. Cohen SA, Egorov AI, Jagai JS, Matyas BT, DeMaria A, Jr., Chui KK, et al. The SEEDs of two gastrointestinal diseases: socioeconomic, environmental, and demographic factors related to cryptosporidiosis and giardiasis in Massachusetts. *Environmental research*. 2008;108(2):185-91. doi:<http://dx.doi.org/10.1016/j.envres.2008.06.009>
19. Danis K, Di Renzi M, O'Neill W, Smyth B, McKeown P, Foley B, et al. Risk factors for sporadic *Campylobacter* infection: an all-Ireland case-control study. *Euro surveillance : bulletin Europeen sur les maladies transmissibles = European communicable disease bulletin*. 2009;14(7).
20. de Wit MA, Koopmans MP, Kortbeek LM, Wannet WJ, Vinje J, van Leusden F, et al. Sensor, a population-based cohort study on gastroenteritis in the Netherlands: incidence and etiology. *American Journal of Epidemiology*. 2001;154(7):666-74.
21. De Wit MAS, Koopmans M. P. G., Van Duynhoven Y. T. H. P. Risk Factors for Norovirus, Sapporo-like Virus, and Group A Rotavirus Gastroenteritis. *Emerging Infectious Diseases*. 2003;9(12):1563-70; .
22. Dennehy PH, Cortese MM, Begue RE, Jaeger JL, Roberts NE, Zhang R, et al. A case-control study to determine risk factors for hospitalization for rotavirus gastroenteritis in U.S. children. *Pediatric Infectious Disease Journal*. 2006;25(12):1123-31.
23. Doorduyn Y, Van Pelt W, Havelaar AH. The burden of infectious intestinal disease (IID) in the community: a survey of self-reported IID in The Netherlands. *Epidemiology & Infection*. 2012;140(7):1185-92. doi:<http://dx.doi.org/10.1017/S0950268811001099>
24. Doré K, Buxton J, Henry B, Pollari F, Middleton D, Fyfe M, et al. Risk factors for *Salmonella typhimurium* DT104 and non-DT104 infection: A Canadian multi-provincial case-control study. *Epidemiology and infection*. 2004;132(3):485-93; . doi:10.1017/s0950268803001924
25. Duggirala HJ, Hassig SE, Santana S, Rice J. Evaluation of a hepatitis A immunization program. *Pediatric Infectious Disease Journal*. 2005;24(11):974-8; . doi:10.1097/01.inf.0000183760.75182.01
26. Eaton-Evans J, Dugdale AE. Effects of feeding and social factors on diarrhoea and vomiting in infants. *Archives of Disease in Childhood*. 1987;62(5):445-8; . doi:10.1136/adc.62.5.445
27. Ethelberg S, Olesen B, Neimann J, Schiellerup P, Helms M, Jensen C, et al. Risk factors for diarrhea among children in an industrialized country. *Epidemiology*. 2006;17(1):24-30.
28. Etiler N, Velipasaoglu S, Aktekin M. Risk factors for overall and persistent diarrhoea in infancy in Antalya, Turkey: A cohort study. *Public health*. 2004;118(1):62-9; . doi:10.1016/s0033-3506(03)00132-x
29. Evans MR, Sarvotham T, Thomas DR, Howard AJ. Domestic and travel-related foodborne gastrointestinal illness in a population health survey. *Epidemiology and infection*. 2006;134(4):686-93; . doi:10.1017/s0950268805005790
30. Faustini A, Marinacci C, Fabrizi E, Marangi M, Recchia O, Pica R, et al. The impact of the Catholic Jubilee in 2000 on infectious diseases. A case-control study of giardiasis, Rome, Italy 2000-2001. *Epidemiology and infection*. 2006;134(3):649-58; . doi:10.1017/s0950268805005327
31. Fein SB, Lin CTJ, Levy AS. Foodborne illness: Perceptions, experience, and preventive behaviors in the United States. *Journal of food protection*. 1995;58(12):1405-11.
32. Fewtrell L, Kay D, Wyer M, O'Neill G. An investigation into the possible links between shigellosis and hepatitis A and public water supply disconnections. *Public health*. 1997;111(3):179-81; . doi:10.1016/s0033-3506(97)00579-9
33. Friedman CR, Hoekstra RM, Samuel M, Marcus R, Bender J, Shiferaw B, et al. Risk factors for sporadic *Campylobacter* infection in the United States: A case-control study in FoodNet sites. *Clinical infectious diseases : an official publication of the Infectious Diseases Society of America*. 2004;38 Suppl 3:S285-96. doi:10.1086/381598



34. Fullerton KE, Ingram LA, Jones TF, Anderson BJ, McCarthy PV, Hurd S, et al. Sporadic campylobacter infection in infants: a population-based surveillance case-control study. *The Pediatric infectious disease journal*. 2007;26(1):19-24. doi:10.1097/01.inf.0000247137.43495.34
35. Gillespie IA, O'Brien, S.J., Penman, C., Tompkins, D., Cowden, J., Humphrey, T.J. Demographic determinants for Campylobacter infection in England and Wales: Implications for future epidemiological studies. *Epidemiology and infection*. 2008;136(12):1717-25. doi:10.1017/S0950268808000319
36. Gillespie I, Mook P, Little C, Grant K, McLauchlin J. Human listeriosis in England, 2001-2007: association with neighbourhood deprivation. *Euro Surveillance*. 2010;15(27).
37. Green CG, Krause, D.O., Wylie, J.L. Spatial analysis of campylobacter infection in the Canadian province of Manitoba. *International Journal of Health Geographics*. 2006;5:-. doi:10.1186/1476-072X-5-2
38. Gupta A, Polyak CS, Bishop RD, Sobel J, Mintz ED. Laboratory-confirmed shigellosis in the United States, 1989-2002: epidemiologic trends and patterns. *Clinical infectious diseases : an official publication of the Infectious Diseases Society of America*. 2004;38(10):1372-7. doi:10.1086/386326
39. Hall GV, Kirk MD, Ashbolt R, Stafford R, Lalor K, Bell R, et al. Frequency of infectious gastrointestinal illness in Australia, 2002: Regional, seasonal and demographic variation. *Epidemiology and infection*. 2006;134(1):111-8. doi:10.1017/S0950268805004656
40. Herikstad H, Yang S, Van Gilder TJ, Vugia D, Hadler J, Blake P, et al. A population-based estimate of the burden of diarrhoeal illness in the United States: FoodNet, 1996-7. *Epidemiology and infection*. 2002;129(1):9-17.
41. Hu W, Mengersen K, Tong S. Spatial analysis of notified cryptosporidiosis infections in Brisbane, Australia. *Annals of epidemiology*. 2009;19(12):900-7. doi:10.1016/j.annepidem.2009.06.004
42. Hu W, Mengersen K, Tong S. Risk factor analysis and spatiotemporal CART model of cryptosporidiosis in Queensland, Australia. *BMC infectious diseases*. 2010;10:311. doi:10.1186/1471-2334-10-311
43. Hughes GJ, Gorton R. Inequalities in the incidence of infectious disease in the North East of England: a population-based study. *Epidemiology & Infection*. 2015;143(1):189-201. doi:<http://dx.doi.org/10.1017/S0950268814000533>
44. Iacono G, Merolla R, D'Amico D, Bonci E, Cavataio F, Di Prima L, et al. Gastrointestinal symptoms in infancy: a population-based prospective study. *Dig Liver Dis*. 2005;37(6):432-8. doi:10.1016/j.dld.2005.01.009
45. Jackson R, Smith D, Tabnak F, Vugia D. Disparities of shigellosis rates among California children by race/ethnicity and census tract poverty level, 2000-2010. *Pediatric Infectious Disease Journal*. 2015;34(8):843-7. doi:10.1097/inf.0000000000000746
46. Jalava K, Ollgren J, Eklund M, Siitonen A, Kuusi M. Agricultural, socioeconomic and environmental variables as risks for human verotoxigenic Escherichia coli (VTEC) infection in Finland. *BMC infectious diseases*. 2011;11:275. doi:<http://dx.doi.org/10.1186/1471-2334-11-275>
47. Jones TF, McMillian MB, Scallan E, Frenzen PD, Cronquist AB, Thomas S, et al. A population-based estimate of the substantial burden of diarrhoeal disease in the United States; FoodNet, 1996-2003. *Epidemiology and infection*. 2007;135(2):293-301. doi:10.1017/S0950268806006765
48. Kass PH, Farver TB, Beaumont JJ, Genigeorgis C, Stevens F. Disease determinants of sporadic salmonellosis in four northern California counties. A case-control study of older children and adults. *Annals of epidemiology*. 1992;2(5):683-96.
49. Kotloff KL, Wasserman SS, Steciak JY, Tall BD, Losonsky GA, Nair P, et al. Acute diarrhea in Baltimore children attending an outpatient clinic. *Pediatric Infectious Disease Journal*. 1988;7(11):753-9.

50. Kum-Nji P, Mangrem CL, Wells PJ, Herrod HG. Is environmental tobacco smoke exposure a risk factor for acute gastroenteritis in young children? *Clinical Pediatrics*. 2009;48(7):756-62; . doi:10.1177/0009922809332591
51. Kyle RG, Kukanova M, Campbell M, Wolfe I, Powell P, Callery P. Childhood disadvantage and emergency admission rates for common presentations in London: an exploratory analysis. *Archives of Disease in Childhood*. 2011;96(3):221-6. doi:<http://dx.doi.org/10.1136/adc.2009.180125>
52. Lake IR, Harrison FC, Chalmers RM, Bentham G, Nichols G, Hunter PR, et al. Case-control study of environmental and social factors influencing cryptosporidiosis. *European journal of epidemiology*. 2007;22(11):805-11.
53. Lake IR, Nichols G, Harrison FC, Bentham G, Sari Kovats R, Grundy C, et al. Using infectious intestinal disease surveillance data to explore illness aetiology; a cryptosporidiosis case study. *Health & place*. 2009;15(1):333-9. doi:10.1016/j.healthplace.2008.06.005
54. Lal A, Baker MG, French NP, Dufour M, Hales S. The epidemiology of human salmonellosis in New Zealand, 1997-2008. *Epidemiology and infection*. 2012;140(9):1685-94; . doi:10.1017/s0950268811002470
55. Lee LA, Shapiro CN, Hargrett-Bean N, Tauxe RV. Hyperendemic shigellosis in the United States: A review of surveillance data for 1967-1988. *Journal of Infectious Diseases*. 1991;164(5):894-900; 894.
56. Ludvigsson JF. Epidemiological study of constipation and other gastrointestinal symptoms in 8000 children. *Acta Paediatrica, International Journal of Paediatrics*. 2006;95(5):573-80. doi:10.1080/08035250500452621
57. MacRitchie LA, Hunter CJ, Strachan NJ. A population-based exposure assessment of risk factors associated with gastrointestinal pathogens: a *Campylobacter* study. *Epidemiology & Infection*. 2013;141(5):976-86. doi:<http://dx.doi.org/10.1017/S0950268812001641>
58. Majowicz SE, Horrocks J, Bocking K. Demographic determinants of acute gastrointestinal illness in Canada: a population study. *BMC public health*. 2007;7:8. doi:10.1186/1471-2458-7-162
59. McAteer A, Elliott, A.M., Hannaford, P.C. Ascertaining the size of the symptom iceberg in a UK-wide community-based survey. *British Journal of General Practice*. 2011;61(582):e1-e11. doi:10.3399/bjgp11X548910
60. McPherson M, Lalor K, Combs B, Raupach J, Stafford R, Kirk MD. Serogroup-specific risk factors for Shiga toxin-producing *Escherichia coli* infection in Australia. *Clinical infectious diseases : an official publication of the Infectious Diseases Society of America*. 2009;49(2):249-56; . doi:10.1086/599370
61. Moorin RE, Heyworth JS, Forbes GM, Riley TV. Long-term health risks for children and young adults after infective gastroenteritis. *Emerging Infectious Diseases*. 2010;16(9):1440-7; . doi:10.3201/eid1609.081665
62. Neal KR, Slack RCB. Diabetes mellitus, anti-secretory drugs and other risk factors for *campylobacter* gastro-enteritis in adults: A case-control study. *Epidemiology and infection*. 1997;119(3):307-11; . doi:10.1017/s0950268897008224
63. Nichols GL, Richardson, J.F., Sheppard, S.K., Lane, C., Sarran, C. *Campylobacter* epidemiology: A descriptive study reviewing 1 million cases in England and Wales between 1989 and 2011. *BMJ open*. 2012;2(4):- . doi:10.1136/bmjopen-2012-001179
64. Odoi A, Martin SW, Michel P, Holt J, Middleton D, Wilson J. Determinants of the geographical distribution of endemic giardiasis in Ontario, Canada: A spatial modelling approach. *Epidemiology and infection*. 2004;132(5):967-76; . doi:10.1017/s0950268804002481
65. Olowokure B, Hawker J, Weinberg J, Gill N, Sufi F. Deprivation and hospital admission for infectious intestinal diseases. *Lancet*. 1999;353(9155):807-8. doi:10.1016/S0140-6736(99)00611-X

66. Özkan S, Tüzün H, Görer N, Ceyhan M, Aycan S, Albayrak S, et al. Water usage habits and the incidence of diarrhea in rural Ankara, Turkey. *Transactions of the Royal Society of Tropical Medicine and Hygiene*. 2007;101(11):1131-5; . doi:10.1016/j.trstmh.2007.05.011
67. Özmert EN, Kilic M, Yurdakök K. Environmental tobacco smoke: Is it a risk factor for diarrhea in 6-18 months old infants? *Central European journal of public health*. 2008;16(2):85-6; .
68. Pardhan-Ali A, Wilson J, Edge VL, Furgal C, Reid-Smith R, Santos M, et al. Community-level risk factors for notifiable gastrointestinal illness in the Northwest Territories, Canada, 1991-2008. *BMC public health*. 2013;13:63. doi:<http://dx.doi.org/10.1186/1471-2458-13-63>
69. Pearl DL, Louie M, Chui L, Dore K, Grimsrud KM, Martin SW, et al. A multi-level approach for investigating socio-economic and agricultural risk factors associated with rates of reported cases of *Escherichia coli* O157 in humans in Alberta, Canada. *Zoonoses & Public Health*. 2009;56(8):455-64. doi:<http://dx.doi.org/10.1111/j.1863-2378.2008.01193.x>
70. Penrose AS, Wells EV, Aiello AE. Infectious causation of chronic disease: Examining the relationship between *Giardia lamblia* infection and irritable bowel syndrome. *World Journal of Gastroenterology*. 2007;13(34):4574-8; .
71. Phillips G, Tam CC, Rodrigues LC, Lopman B. Risk factors for symptomatic and asymptomatic norovirus infection in the community. *Epidemiology & Infection*. 2011;139(11):1676-86. doi:<http://dx.doi.org/10.1017/S0950268810002839>
72. Pockett RD, Adlard N, Carroll S, Rajoriya F. Paediatric hospital admissions for rotavirus gastroenteritis and infectious gastroenteritis of all causes in England: an analysis of correlation with deprivation. *Current medical research and opinion*. 2011;27(4):777-84. doi:10.1185/03007995.2011.555757
73. Pollard CM, Meng X, Williamson S, Dodds J, Binns CW. Eating out is associated with self-reported food poisoning: a Western Australia population perspective, 1998 to 2009. *Public health nutrition*. 2014;17(10):2270-7. doi:10.1017/s1368980013002371
74. Pyra M, Conover C, Howland J, Soyemi K. Determinants of campylobacteriosis notifications in New Zealand. *Epidemiology and infection*. 2012;140(11):2087-8. doi:10.1017/s0950268812000441
75. Quigley MA, Cumberland P, Cowden JM, Rodrigues LC. How protective is breast feeding against diarrhoeal disease in infants in 1990s England? A case-control study. *Archives of Disease in Childhood*. 2006;91(3):245-50; . doi:10.1136/adc.2005.074260
76. Rind E, Pearce J. The spatial distribution of campylobacteriosis in New Zealand, 1997-2005. *Epidemiology & Infection*. 2010;138(10):1359-71. doi:<http://dx.doi.org/10.1017/S095026881000018X>
77. Rodrigues LC, Cowden JM, Wheeler JG, Sethi D, Wall PG, Cumberland P, et al. The study of infectious intestinal disease in England: Risk factors for cases of infectious intestinal disease with *Campylobacter jejuni* infection. *Epidemiology and infection*. 2001;127(2):185-93; .
78. Sakuma M, Urashima M, Okabe N. Verocytotoxin-producing *Escherichia coli*, Japan, 1999-2004. *Emerging Infectious Diseases*. 2006;12(2):323-5.
79. Sargeant JM, Majowicz SE, Snelgrove J. The burden of acute gastrointestinal illness in Ontario, Canada, 2005-2006. *Epidemiology and infection*. 2008;136(4):451-60. doi:10.1017/S0950268807008837
80. Satterthwaite P, Pritchard K, Floyd D, Law B. A case-control study of *Yersinia enterocolitica* infections in Auckland. *Australian and New Zealand Journal of Public Health*. 1999;23(5):482-5; .
81. Scallan E, Fitzgerald M, Collins C, Crowley D, Daly L, Devine M, et al. Acute gastroenteritis in northern Ireland and the Republic of Ireland: a telephone survey. *Communicable disease and public health / PHLS*. 2004;7(1):61-7.
82. Seo JY, Seo JH, Kim MH, Ki M, Park HS, Choi BY. Pattern of hepatitis A incidence according to area characteristics using national health insurance data. *Journal of Preventive Medicine and Public Health*. 2012;45(3):164-73; . doi:10.3961/jpmph.2012.45.3.164

83. Seo JY, Choi BY, Ki M, Jang HL, Park HS, Son HJ, et al. Risk factors for acute hepatitis a infection in Korea in 2007 and 2009: A case-control study. *Journal of Korean Medical Science*. 2013;28(6):908-14. doi:10.3346/jkms.2013.28.6.908
84. Sethi D, Cumberland P, Hudson MJ, Rodrigues LC, Wheeler JG, Roberts JA, et al. A study of infectious intestinal disease in England: risk factors associated with group A rotavirus in children. *Epidemiology and Infection*. 2001;126(1):63-70.
85. Simonsen J, Frisch M, Ethelberg S. Socioeconomic risk factors for bacterial gastrointestinal infections. *Epidemiology*. 2008;19(2):282-90. doi:10.1097/EDE.0b013e3181633c19
86. Spencer SE, Marshall J, Pirie R, Campbell D, Baker MG, French NP. The spatial and temporal determinants of campylobacteriosis notifications in New Zealand, 2001-2007. *Epidemiology & Infection*. 2012;140(9):1663-77. doi:<http://dx.doi.org/10.1017/S0950268811002159>
87. Stafford RJ, Schluter P, Kirk M, Wilson A, Unicomb L, Ashbolt R, et al. A multi-centre prospective case-control study of campylobacter infection in persons aged 5 years and older in Australia. *Epidemiology and Infection*. 2007;135(6):978-88. doi:10.1017/s0950268806007576
88. Stone DH, Mitchell S., Packham B., Williams J. Prevalence and first-line treatment of diarrhoeal symptoms in the community. *Public Health*. 1994;108(1):61-8; . doi:10.1016/s0033-3506(05)80037-x
89. Tam CC, Viviani L, Rodrigues LC, O'Brien SJ. The second study of infectious intestinal disease (IID2): Increased rates of recurrent diarrhoea in individuals aged 65 years and above. *BMC public health*. 2013;13(1). doi:10.1186/1471-2458-13-739
90. Teschke K, Bellack N, Shen H, Atwater J, Chu R, Koehoorn M, et al. Water and sewage systems, socio-demographics, and duration of residence associated with endemic intestinal infectious diseases: a cohort study. *BMC public health*. 2010;10:767. doi:<http://dx.doi.org/10.1186/1471-2458-10-767>
91. Turkish Ministry of Health. Turkey 1993: results from the demographic and health survey. *Studies in family planning*. 1995;26(3):180-4.
92. Unicomb LE, Dalton CB, Gilbert GL, Becker NG, Patel MS. Age-specific risk factors for sporadic Campylobacter infection in regional Australia. *Foodborne Pathog Dis*. 2008;5(1):79-85. doi:10.1089/fpd.2007.0047
93. Van Cauteren D, De Valk H, Vaux S, Le Strat Y, Vaillant V. Burden of acute gastroenteritis and healthcare-seeking behaviour in France: a population-based study. *Epidemiology and Infection*. 2012;140(4):697-705. doi:10.1017/S0950268811000999
94. Varga C, Pearl DL, McEwen SA, Sargeant JM, Pollari F, Guerin MT. Evaluating area-level spatial clustering of Salmonella Enteritidis infections and their socioeconomic determinants in the greater Toronto area, Ontario, Canada (2007 - 2009): a retrospective population-based ecological study. *BMC public health*. 2013;13:1078. doi:<http://dx.doi.org/10.1186/1471-2458-13-1078>
95. Weisent J, Rohrbach B, Dunn JR, Odoi A. Socioeconomic determinants of geographic disparities in campylobacteriosis risk: a comparison of global and local modeling approaches. *Int J Health Geogr*. 2012;11(1):45. doi:10.1186/1476-072X-11-45
96. Whitney BM, Mainero C, Humes E, Hurd S, Niccolai L, Hadler JL. Socioeconomic status and foodborne pathogens in Connecticut, USA, 2000–2011. *Emerging Infectious Diseases*. 2015;21(9):1617-24. doi:10.3201/eid2109.150277
97. Wilking H, Hohle M, Velasco E, Suckau M, Eckmanns T. Ecological analysis of social risk factors for Rotavirus infections in Berlin, Germany, 2007-2009. *Int J Health Geogr*. 2012;11:37. doi:<http://dx.doi.org/10.1186/1476-072X-11-37>
98. Wilking H, Spitznagel H, Werber D, Lange C, Jansen A, Stark K. Acute gastrointestinal illness in adults in Germany: a population-based telephone survey. *Epidemiology & Infection*. 2013;141(11):2365-75. doi:<http://dx.doi.org/10.1017/S0950268813000046>

99. Xu Z, Hu W, Tong S. The geographical co-distribution and socio-ecological drivers of childhood pneumonia and diarrhoea in Queensland, Australia. *Epidemiology & Infection*. 2015;143(5):1096-104.
100. Younus M, Hartwick E, Siddiqi AA, Wilkins M, Davies HD, Rahbar M, et al. The role of neighborhood level socioeconomic characteristics in Salmonella infections in Michigan (1997-2007): assessment using geographic information system. *Int J Health Geogr*. 2007;6:56.
101. Younus M, Wilkins MJ, Davies HD, Rahbar MH, Funk J, Nguyen C, et al. The role of exposures to animals and other risk factors in sporadic, non-typhoidal Salmonella infections in Michigan children. *Zoonoses & Public Health*. 2010;57(7-8):e170-6.  
doi:<http://dx.doi.org/10.1111/j.1863-2378.2010.01324.x>
102. Zappe Pasturel B, Cruz-Cano R, Rosenberg Goldstein RE, Palmer A, Blythe D, Ryan P, et al. Impact of rurality, broiler operations, and community socioeconomic factors on the risk of campylobacteriosis in Maryland. *Am J Public Health*. 2013;103(12):2267-75.  
doi:10.2105/AJPH.2013.301338

**Table B3: Excluded studies with rationale**

| <b>First Author</b> | <b>Year</b> | <b>Reason for exclusion</b>                         |
|---------------------|-------------|-----------------------------------------------------|
| Admoni              | 1995        | Non OECD at time of data collection                 |
| Aksoy               | 2007        | Asymptomatic participants potentially included      |
| Allerberger         | 1996        | No analysis by disadvantaged compared to advantaged |
| Alter               | 1982        | Outcome not acute-GI infection                      |
| Alter               | 1989        | Outcome not acute-GI infection                      |
| Alvarado-Esquivel   | 2014        | Asymptomatic participants potentially included      |
| Alvarez-Muñoz       | 1999        | Asymptomatic participants potentially included      |
| Andrews             | 2003        | No analysis by disadvantaged compared to advantaged |
| Araya               | 1986        | Non OECD at time of data collection                 |
| Art                 | 1991        | No analysis by disadvantaged compared to advantaged |
| Baaten              | 2007        | Asymptomatic participants potentially included      |
| Baker               | 2012        | Outcome not acute-GI infection                      |
| Bell                | 2005        | Asymptomatic participants potentially included      |
| Bilenko             | 1999        | Non OECD at time of data collection                 |
| Blackman            | 1989        | No analysis by disadvantaged compared to advantaged |
| Bojalil             | 1994        | Non OECD at time of data collection                 |
| Bollag              | 1980        | No analysis by disadvantaged compared to advantaged |
| Bolumar             | 1995        | Asymptomatic participants potentially included      |
| Boreham             | 1981        | Asymptomatic participants potentially included      |
| Bozkurt             | 2001        | No analysis by disadvantaged compared to advantaged |
| Brandt              | 1983        | No analysis by disadvantaged compared to advantaged |
| Brieseman           | 1985        | No analysis by disadvantaged compared to advantaged |
| Brieseman           | 1990        | No analysis by disadvantaged compared to advantaged |
| Britt               | 2005        | No analysis by disadvantaged compared to advantaged |
| Broner              | 2010        | Outcome not acute-GI infection                      |
| Bryant              | 1989        | No analysis by disadvantaged compared to advantaged |
| Bura                | 2012        | Asymptomatic participants potentially included      |
| Burström            | 2005        | Data collected pre-1980                             |
| Buti                | 2006        | Asymptomatic participants potentially included      |
| Bytzer              | 2001        | Outcome not acute-GI infection                      |
| Calderon            | 1990        | Not available in English                            |
| Callery             | 2010        | Outcome not acute-GI infection                      |
| Cantey              | 2011        | No population comparison                            |
| Cedillo-Rivera      | 2009        | Asymptomatic participants potentially included      |
| Çeliksöz            | 2005a       | Asymptomatic participants potentially included      |
| Çeliksöz            | 2005b       | Asymptomatic participants potentially included      |
| Ceran               | 2012        | Asymptomatic participants potentially included      |
| Cevahir             | 2013        | Asymptomatic participants potentially included      |
| Ceyhan              | 2008        | Asymptomatic participants potentially included      |
| Charlett            | 2003        | No analysis by disadvantaged compared to advantaged |
| Chiaromonte         | 1983        | Asymptomatic participants potentially included      |
| Cifuentes           | 1999        | Outcome not acute-GI infection                      |
| Cifuentes           | 2002        | Study participants duplicated elsewhere             |
| Cilla               | 2010        | No analysis by disadvantaged compared to advantaged |
| Colak               | 2002        | Asymptomatic participants potentially included      |
| Collins             | 2015        | Outcome not acute-GI infection                      |
| Connelly            | 2014        | Outcome not acute-GI infection                      |
| Conway              | 1990        | Outcome not acute-GI infection                      |
| Cross               | 2009        | No analysis by disadvantaged compared to advantaged |

|                 |       |                                                     |
|-----------------|-------|-----------------------------------------------------|
| Davila          | 2009  | No analysis by disadvantaged compared to advantaged |
| Davis           | 2013  | No analysis by disadvantaged compared to advantaged |
| De Wit          | 2001b | No analysis by disadvantaged compared to advantaged |
| Deveci          | 2014  | Asymptomatic participants potentially included      |
| Diel            | 2001  | No analysis by disadvantaged compared to advantaged |
| Ditah           | 2014  | Asymptomatic participants potentially included      |
| Domínguez       | 2007  | Asymptomatic participants potentially included      |
| Doni            | 2015  | No analysis by disadvantaged compared to advantaged |
| Dostal          | 2001  | No analysis by disadvantaged compared to advantaged |
| Drobeniuc       | 2013  | No analysis by disadvantaged compared to advantaged |
| Dubnov          | 2004  | Non OECD at time of data collection                 |
| Ekramul Hoque   | 2002  | No analysis by disadvantaged compared to advantaged |
| Ellenweig       | 1986  | Non OECD at time of data collection                 |
| elSaadany       | 2002  | No analysis by disadvantaged compared to advantaged |
| Erdogan         | 2012  | Asymptomatic participants potentially included      |
| Erdogan         | 2004  | Asymptomatic participants potentially included      |
| Ersoy           | 1998  | Asymptomatic participants potentially included      |
| Escobedo        | 2011  | No analysis by disadvantaged compared to advantaged |
| Esparza-Aguilar | 2014  | Outcome not acute-GI infection                      |
| Esparza-Aguilar | 2013  | Outcome not acute-GI infection                      |
| Faulkner        | 2003  | Asymptomatic participants potentially included      |
| Feeney          | 1998  | Outcome not acute-GI infection                      |
| Fewtrell        | 1994  | Study participants duplicated elsewhere             |
| Finkelman       | 1994  | Non OECD at time of data collection                 |
| Ford-Jones      | 2000  | No analysis by disadvantaged compared to advantaged |
| Forman          | 1984  | No analysis by disadvantaged compared to advantaged |
| Forsberg        | 2009  | Review/case report/RCT                              |
| Francis         | 1984  | No analysis by disadvantaged compared to advantaged |
| Fraser          | 1998  | Non OECD at time of data collection                 |
| Frost           | 2004  | Asymptomatic participants potentially included      |
| Galanis         | 2014  | No population comparison                            |
| Gangarosa       | 1992  | Outcome not acute-GI infection                      |
| Gastañaduy      | 2013  | No analysis by disadvantaged compared to advantaged |
| Gibson          | 1985  | Outcome not acute-GI infection                      |
| Gomes           | 2011  | Outcome not acute-GI infection                      |
| Graham          | 1988  | No analysis by disadvantaged compared to advantaged |
| Grimwood        | 2006  | No population comparison                            |
| Guerrero        | 2004  | No analysis by disadvantaged compared to advantaged |
| Haley           | 2010  | No analysis by disadvantaged compared to advantaged |
| Hannah          | 2005  | Outcome not acute-GI infection                      |
| Harter          | 1982  | No analysis by disadvantaged compared to advantaged |
| Hayes-Bautista  | 1994  | No analysis by disadvantaged compared to advantaged |
| Hemmelgarn      | 1993  | No analysis by disadvantaged compared to advantaged |
| Hepworth        | 2010  | Study participants duplicated elsewhere             |
| Hizo-Abes       | 2013  | No population comparison                            |
| Ho              | 1988  | Non OECD at time of data collection                 |
| Hoque           | 2002  | No analysis by disadvantaged compared to advantaged |
| Howell          | 2006  | Outcome not acute-GI infection                      |
| Huerta          | 2006  | No analysis by disadvantaged compared to advantaged |
| Hughes          | 2013  | Outcome not acute-GI infection                      |
| Ikram           | 1994  | No analysis by disadvantaged compared to advantaged |
| Imhoff          | 2004  | Study participants duplicated elsewhere             |

|                 |      |                                                     |
|-----------------|------|-----------------------------------------------------|
| Jayasinghe      | 2013 | No analysis by disadvantaged compared to advantaged |
| Jiménez-Moleón  | 2011 | No analysis by disadvantaged compared to advantaged |
| Jones           | 2007 | No analysis by disadvantaged compared to advantaged |
| Jones           | 1994 | Review/case report/RCT                              |
| Julio           | 2012 | Asymptomatic participants potentially included      |
| Kanra           | 2002 | Asymptomatic participants potentially included      |
| Kapperud        | 2003 | No analysis by disadvantaged compared to advantaged |
| Kapperud        | 1995 | No analysis by disadvantaged compared to advantaged |
| Karaman         | 2015 | No analysis by disadvantaged compared to advantaged |
| Kaya            | 2007 | Asymptomatic participants potentially included      |
| Koopman         | 1989 | Asymptomatic participants potentially included      |
| Krebs           | 2011 | Non OECD at time of data collection                 |
| Kruszon-Moran   | 2005 | Asymptomatic participants potentially included      |
| Kuhls           | 1994 | No analysis by disadvantaged compared to advantaged |
| Kurugöl         | 2003 | No population comparison                            |
| Kurugöl         | 2011 | Asymptomatic participants potentially included      |
| Kurugöl         | 2009 | Asymptomatic participants potentially included      |
| Kyle            | 2012 | Outcome not acute-GI infection                      |
| Lazcano-Ponce   | 2013 | Asymptomatic participants potentially included      |
| Leach           | 1999 | Asymptomatic participants potentially included      |
| Leach           | 2000 | Asymptomatic participants potentially included      |
| Lee             | 2013 | No analysis by disadvantaged compared to advantaged |
| LeJeune         | 2010 | Review/case report/RCT                              |
| Lerman          | 1999 | No analysis by disadvantaged compared to advantaged |
| Leshem          | 2015 | No analysis by disadvantaged compared to advantaged |
| Letaief         | 2005 | Asymptomatic participants potentially included      |
| Levesque        | 2013 | No analysis by disadvantaged compared to advantaged |
| Levine          | 1993 | No analysis by disadvantaged compared to advantaged |
| Levy            | 1998 | No analysis by disadvantaged compared to advantaged |
| Liddle          | 1997 | No analysis by disadvantaged compared to advantaged |
| Long            | 2006 | Review/case report/RCT                              |
| Lopman          | 2012 | Outcome not acute-GI infection                      |
| Lupo            | 1989 | No analysis by disadvantaged compared to advantaged |
| Ma              | 2009 | No analysis by disadvantaged compared to advantaged |
| Maguire         | 1995 | No analysis by disadvantaged compared to advantaged |
| Majowicz        | 2004 | Study participants duplicated elsewhere             |
| Maltezou        | 2001 | No population comparison                            |
| Manasek         | 2004 | No analysis by disadvantaged compared to advantaged |
| Maral           | 2010 | Asymptomatic participants potentially included      |
| Markus          | 2011 | Asymptomatic participants potentially included      |
| Martínez-García | 1989 | Non OECD at time of data collection                 |
| Masia           | 2004 | No analysis by disadvantaged compared to advantaged |
| McCann          | 2002 | No analysis by disadvantaged compared to advantaged |
| McQuillan       | 2004 | Asymptomatic participants potentially included      |
| Medeiros        | 2006 | Review/case report/RCT                              |
| Mehal           | 2012 | Outcome not acute-GI infection                      |
| Mor             | 2015 | Asymptomatic participants potentially included      |
| Morales         | 1992 | Asymptomatic participants potentially included      |
| Morris          | 1983 | Data collected pre-1980                             |
| Moyo            | 2014 | Non OECD at time of data collection                 |
| Muhsen          | 2014 | Non OECD at time of data collection                 |
| Muhsen          | 2010 | Non OECD at time of data collection                 |



|             |       |                                                     |
|-------------|-------|-----------------------------------------------------|
| Mullner     | 2010  | No analysis by disadvantaged compared to advantaged |
| Naess       | 2012  | No population comparison                            |
| Najnin      | 2014  | No analysis by disadvantaged compared to advantaged |
| Nathwani    | 1995  | Review/case report/RCT                              |
| Nelson      | 1985  | Review/case report/RCT                              |
| Newbold     | 2013  | No analysis by disadvantaged compared to advantaged |
| Newman      | 1999  | No quantitative results                             |
| Nicoll      | 2000  | No analysis by disadvantaged compared to advantaged |
| Noone       | 2000  | No analysis by disadvantaged compared to advantaged |
| North       | 1999  | No analysis by disadvantaged compared to advantaged |
| Novotny     | 1990  | Asymptomatic participants potentially included      |
| Ochnio      | 2005  | Asymptomatic participants potentially included      |
| Okur        | 2011  | Not available in English                            |
| Okyay       | 2004  | Asymptomatic participants potentially included      |
| Olcay       | 2003  | Asymptomatic participants potentially included      |
| Olsen       | 2006  | No analysis by disadvantaged compared to advantaged |
| Omurtag     | 2013  | No analysis by disadvantaged compared to advantaged |
| Ong         | 2012  | No analysis by disadvantaged compared to advantaged |
| Ostan       | 2007  | Asymptomatic participants potentially included      |
| Ozturk      | 2004  | No analysis by disadvantaged compared to advantaged |
| Ozturk      | 1996  | Outcome not acute-GI infection                      |
| Painter     | 2015  | No analysis by disadvantaged compared to advantaged |
| Palti       | 1984  | Non OECD at time of data collection                 |
| Parashar    | 1998  | Outcome not acute-GI infection                      |
| Pasquini    | 1984  | Asymptomatic participants potentially included      |
| Patel       | 2015  | Asymptomatic participants potentially included      |
| Peasey      | 2004  | Asymptomatic participants potentially included      |
| Pérez-Rubio | 2011  | No analysis by disadvantaged compared to advantaged |
| Pollock     | 2006  | No analysis by disadvantaged compared to advantaged |
| Potter      | 2003  | No analysis by disadvantaged compared to advantaged |
| Psichogiou  | 1995  | No analysis by disadvantaged compared to advantaged |
| Quihui      | 2010  | Asymptomatic participants potentially included      |
| Quihui      | 2006  | Asymptomatic participants potentially included      |
| Quihui-Cota | 2015  | Asymptomatic participants potentially included      |
| Quinlan     | 2013  | Review/case report/RCT                              |
| Rajan       | 1998  | Asymptomatic participants potentially included      |
| Redlinger   | 1998  | No analysis by disadvantaged compared to advantaged |
| Redlinger   | 1997  | Asymptomatic participants potentially included      |
| Redlinger   | 2002  | No analysis by disadvantaged compared to advantaged |
| Rees        | 1995  | No analysis by disadvantaged compared to advantaged |
| Ricotta     | 2014  | No analysis by disadvantaged compared to advantaged |
| Rishpon     | 1984  | Non OECD at time of data collection                 |
| Roos        | 2005  | Outcome not acute-GI infection                      |
| Russo       | 1997  | Outcome not acute-GI infection                      |
| Sandberg    | 2006  | No analysis by disadvantaged compared to advantaged |
| Scavia      | 2012  | No analysis by disadvantaged compared to advantaged |
| Schmeer     | 2009  | No analysis by disadvantaged compared to advantaged |
| Sénécal     | 2008  | No population comparison                            |
| Sepulveda   | 1988  | Non OECD at time of data collection                 |
| Silk        | 2012  | Review/case report/RCT                              |
| Snel        | 2009a | Study participants duplicated elsewhere             |
| Snel        | 2009b | No analysis by disadvantaged compared to advantaged |

|                 |      |                                                     |
|-----------------|------|-----------------------------------------------------|
| Spencer         | 1988 | Non OECD at time of data collection                 |
| Stafford        | 2007 | No analysis by disadvantaged compared to advantaged |
| Standeart       | 2015 | No analysis by disadvantaged compared to advantaged |
| Stone           | 1993 | No population comparison                            |
| Strauss         | 2001 | No analysis by disadvantaged compared to advantaged |
| Stroffolini     | 1990 | Asymptomatic participants potentially included      |
| Stroffolini     | 1991 | Asymptomatic participants potentially included      |
| Stroffolini     | 1989 | Asymptomatic participants potentially included      |
| Stroffolini     | 1996 | Outcome not acute-GI infection                      |
| Studahl         | 2000 | No analysis by disadvantaged compared to advantaged |
| Talbot-Smith    | 2002 | No analysis by disadvantaged compared to advantaged |
| Tappero         | 1995 | No analysis by disadvantaged compared to advantaged |
| Termorshuizen   | 2000 | Asymptomatic participants potentially included      |
| Teshale         | 2015 | Asymptomatic participants potentially included      |
| Thomas          | 1993 | Asymptomatic participants potentially included      |
| Thomas          | 2008 | No analysis by disadvantaged compared to advantaged |
| Thomas          | 2011 | Non OECD at time of data collection                 |
| Thoren          | 1995 | No analysis by disadvantaged compared to advantaged |
| Thoren          | 1988 | No analysis by disadvantaged compared to advantaged |
| Thornley        | 2002 | No analysis by disadvantaged compared to advantaged |
| Thrane          | 2005 | No quantitative results                             |
| To              | 1996 | Outcome not acute-GI infection                      |
| Tosun           | 2004 | Asymptomatic participants potentially included      |
| Uhlig           | 2014 | No analysis by disadvantaged compared to advantaged |
| Vancelik        | 2006 | Asymptomatic participants potentially included      |
| Vasquez-Garibay | 2015 | Asymptomatic participants potentially included      |
| Verma           | 2014 | Non OECD at time of data collection                 |
| Vranckx         | 1990 | Data collected pre-1980                             |
| Vranckx         | 1984 | Asymptomatic participants potentially included      |
| Vrbova          | 2012 | No analysis by disadvantaged compared to advantaged |
| Vulcano         | 2007 | Asymptomatic participants potentially included      |
| Warburton       | 1994 | No analysis by disadvantaged compared to advantaged |
| Withers         | 2002 | No analysis by disadvantaged compared to advantaged |
| Yapicioglu      | 2002 | Asymptomatic participants potentially included      |
| Yoon            | 2014 | Asymptomatic participants potentially included      |
| Zaidi           | 2012 | No analysis by disadvantaged compared to advantaged |
| Ziv             | 2011 | Non OECD at time of data collection                 |

**Figure A: Harvest plot for risk of GI infection by SES, stratified by age, predominant pathogen transmission route and SES measure**

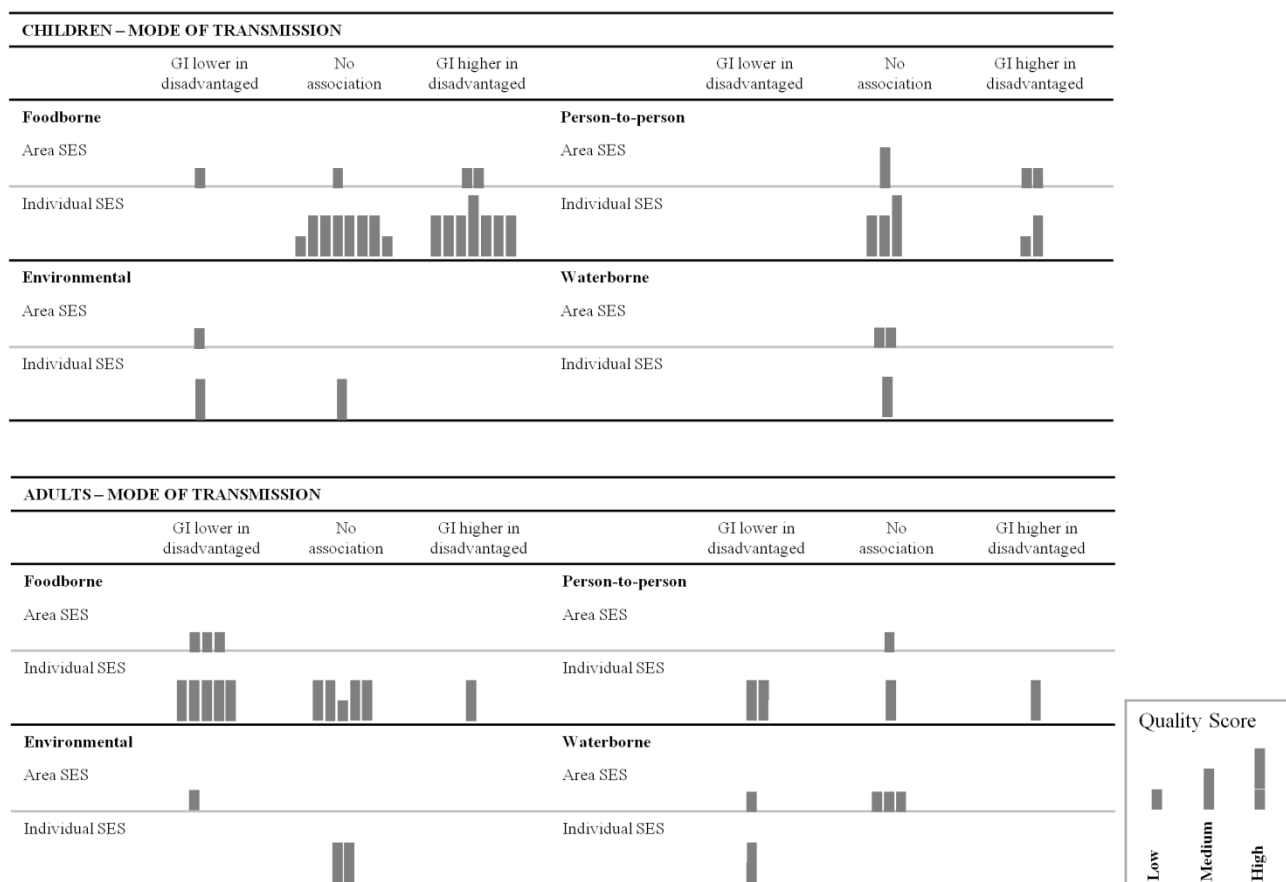

**Appendix 3: Legend**

Harvest plots were used to demonstrate the relationship between socioeconomic status (SES) and gastrointestinal (GI) infection risk, by displaying and summarising the results of the studies and the subgrouping graphically. Each reported point estimate for the association between SES and GI infection risk was represented by a single bar. The height of the bars were used to indicate the quality score (low, medium or high quality) assigned to the study from which the estimates arose. The process for assigning quality is described in the Methods section. Children were defined as participants of studies aged less than 18 years; adults were defined as participants of studies aged 18 years or older. Estimates were grouped according to the level at which SES was measured, and pathogen type according to the predominant mode of transmission. The harvest plots partition the point estimates into three results: estimates that indicate GI infection risk is lower in more disadvantaged groups; estimates that indicate there is no relationship; and estimates that indicate GI infection risk is higher in more disadvantaged groups.

**Figure B: Contour enhanced funnel plot**

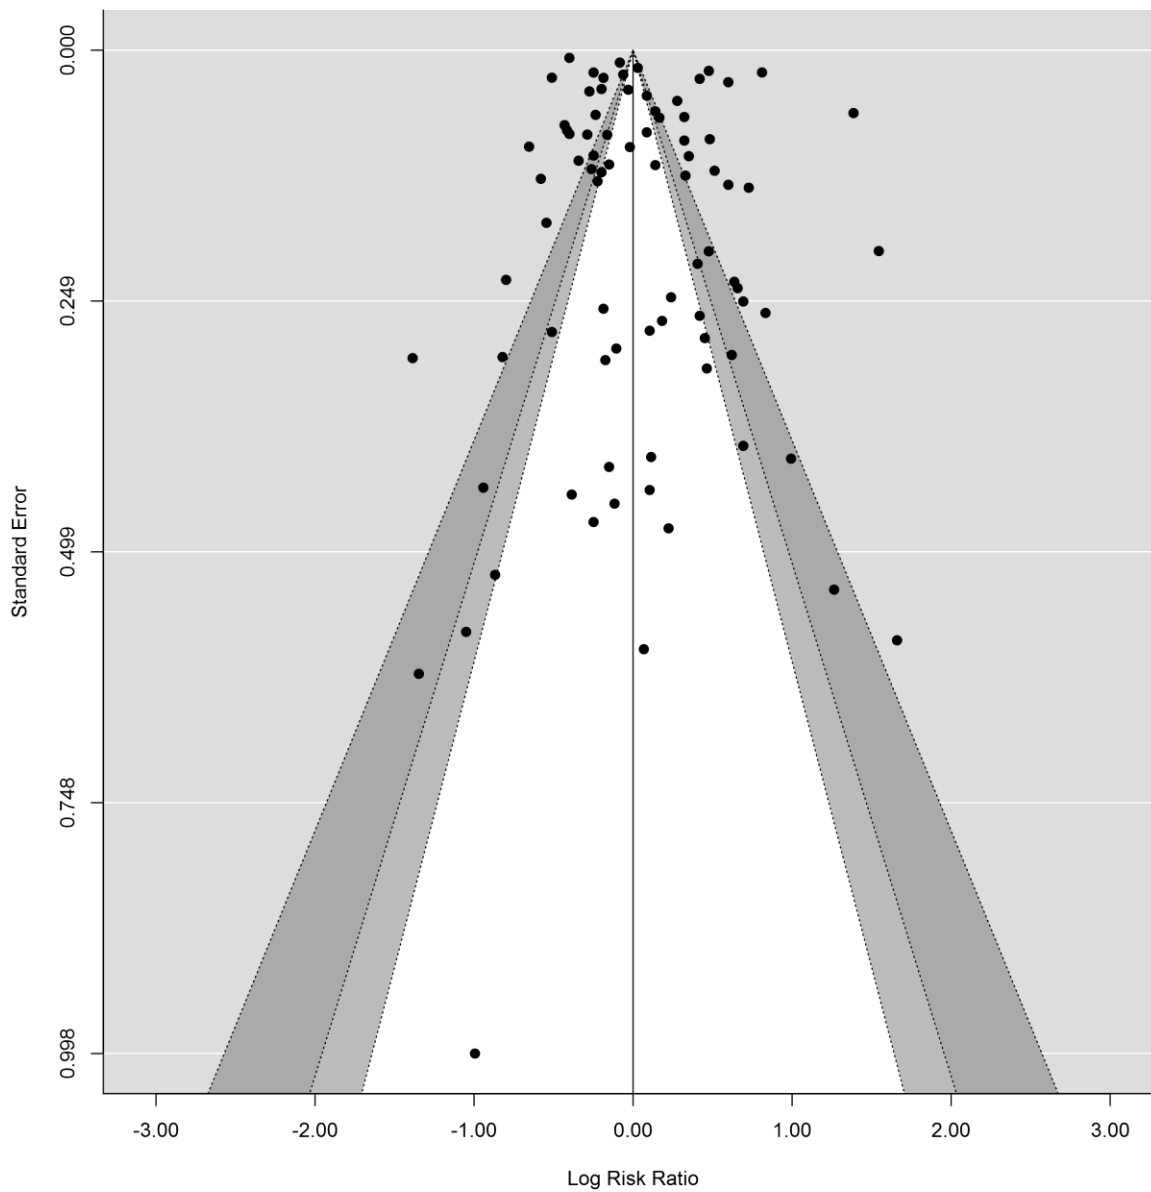

White = P-value > 0.10  
Mid-gray = P-value between 0.10 and 0.05  
Dark-gray = P-value between 0.05 and 0.01  
Region outside of funnel = P-value < 0.01
